# Supplementary material
Source: PubMed Central journal article supplement (PMC5656065)
Supplement: NIHMS856844-supplement-Supplemental_Figure.pdf [file NIHMS856844-supplement-Supplemental_Figure.pdf]

## Supplemental Figure

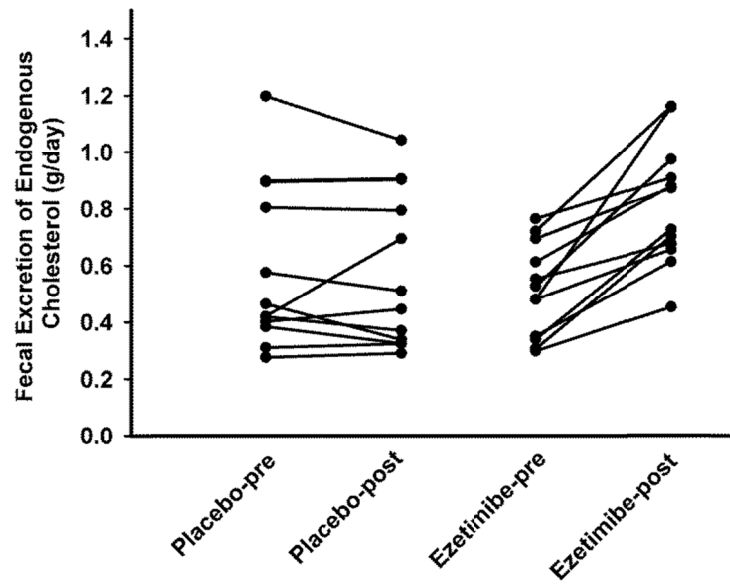

### Individual fecal excretion of endogenous cholesterol

Fecal excretion of endogenous cholesterol was measured as described in Materials and Methods in placebo (n=12) or ezetimibe (n=12) groups before and after treatment for 6 weeks.
