# Supplementary material
Source: PubMed Central journal article supplement (PMC5656065)

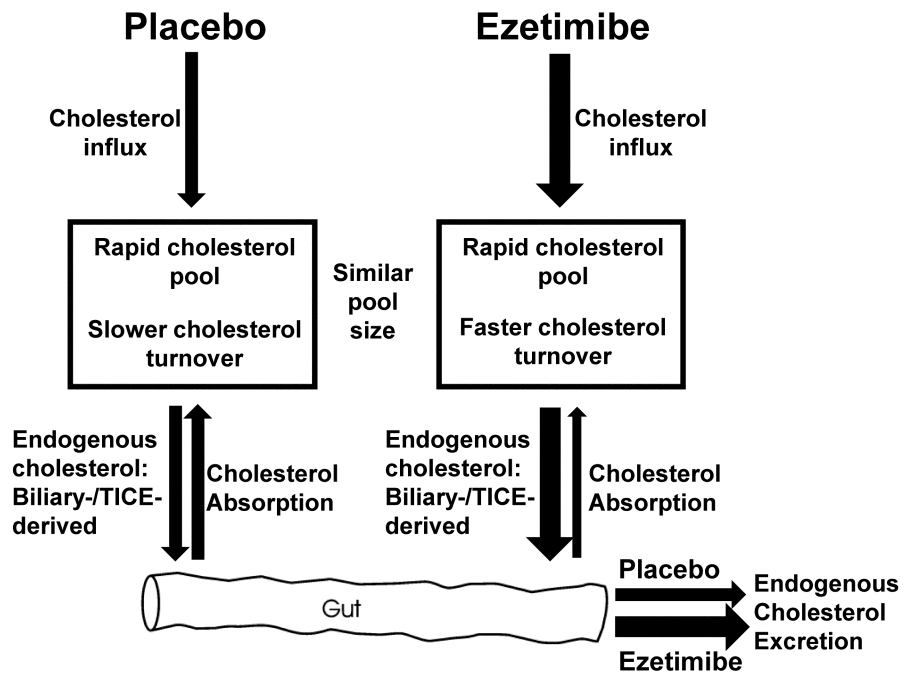

Supplement: NIHMS856844-supplement-Graphic_Abstract.pdf [file NIHMS856844-supplement-Graphic_Abstract.pdf]
